# Supplementary material for: Atypical chemokine receptor ACKR2 controls branching morphogenesis in the developing mammary gland
Source: Oxford University Press journal article supplement (doi:10.1242/dev.139733), 2016-01-01
Supplement: dev139733supp.pdf [file dev139733supp.pdf]

## Supplemental Information

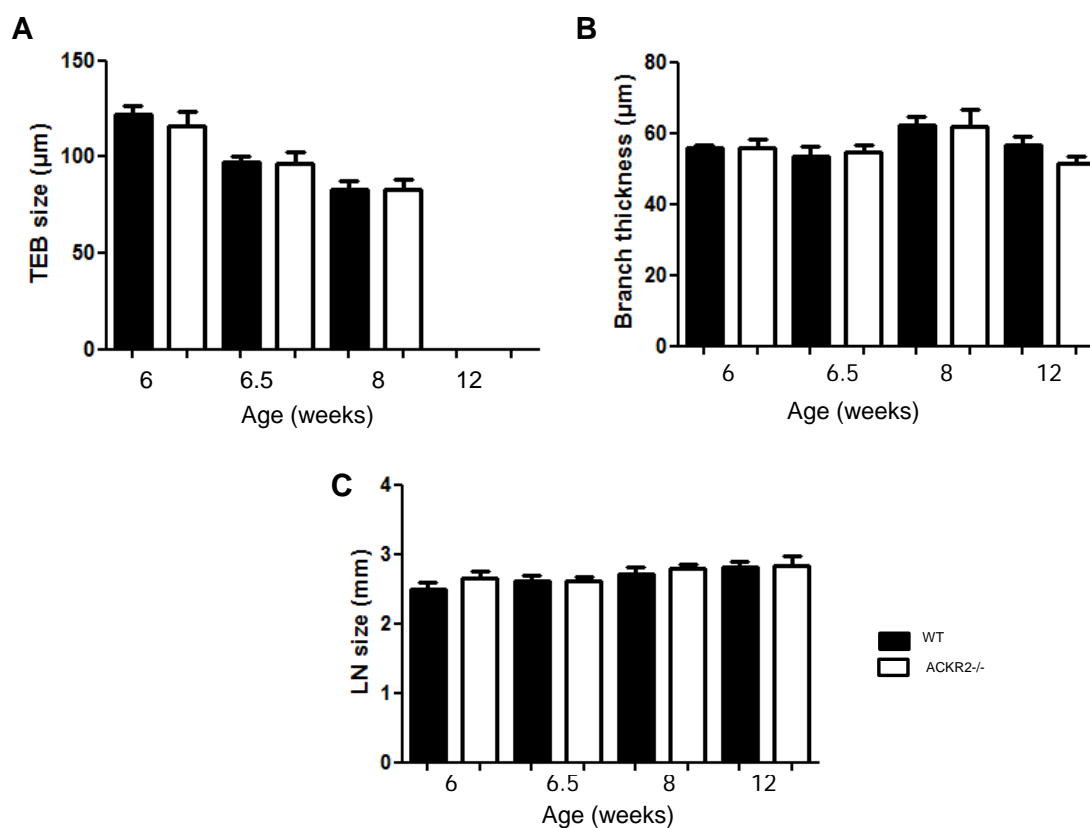

**Supplemental Figure S1: ACKR2 does not control morphology of branches or TEBs within the developing mammary gland.** Carmine alum whole-mounts were obtained from virgin WT and ACKR2<sup>-/-</sup> mammary glands at 6 (n=6), 6.5 (n=8), 8 (n=8) and 12 weeks old (n=9). a) The average width of all the TEBs from 3 F.O.V (5x) per gland was measured. b) Branch thickness was the average from 3 measurements from 3 F.O.V (5x) per gland, and c) the length of the inguinal LN was measured using ImageJ. Where there is no indication results were not statistically significant. Error bars represent S.E.M.

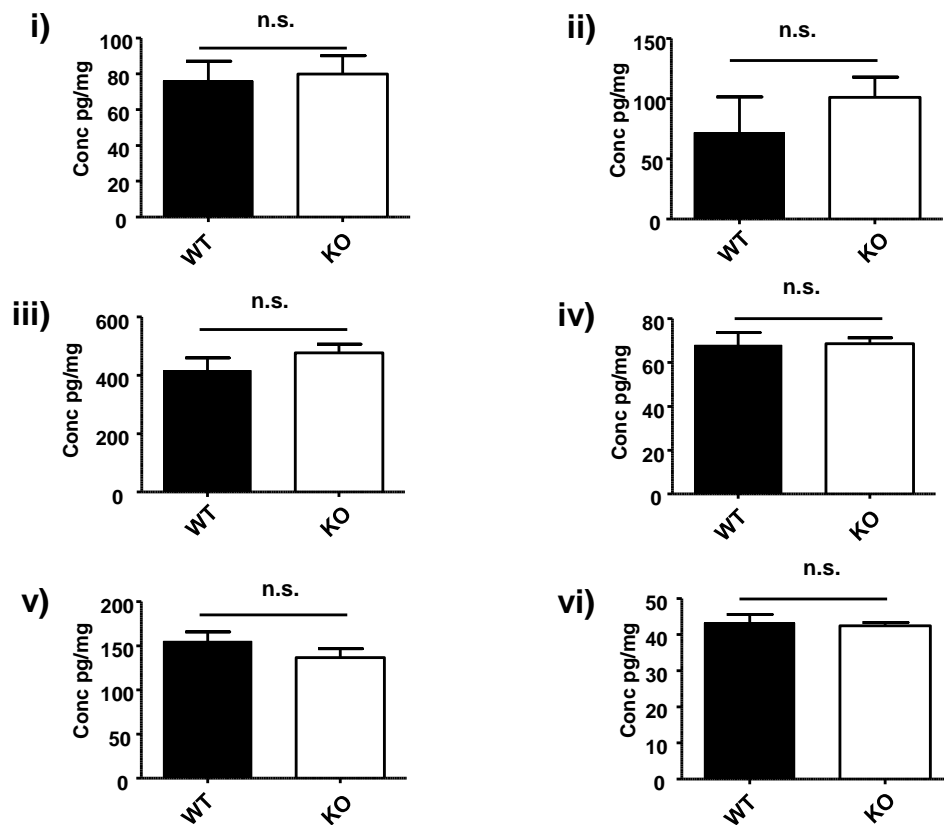

**Supplemental Figure S2: Chemokine and cytokine expression in WT and ACKR2<sup>-/-</sup> mammary glands.** Multiplexing was used to assess levels of i) CCL2; ii) CCL4; iii) CCL5; iv) CCL22; v) CXCL1 and vi) CSF-1. n=8 per group n.s. = not significant.

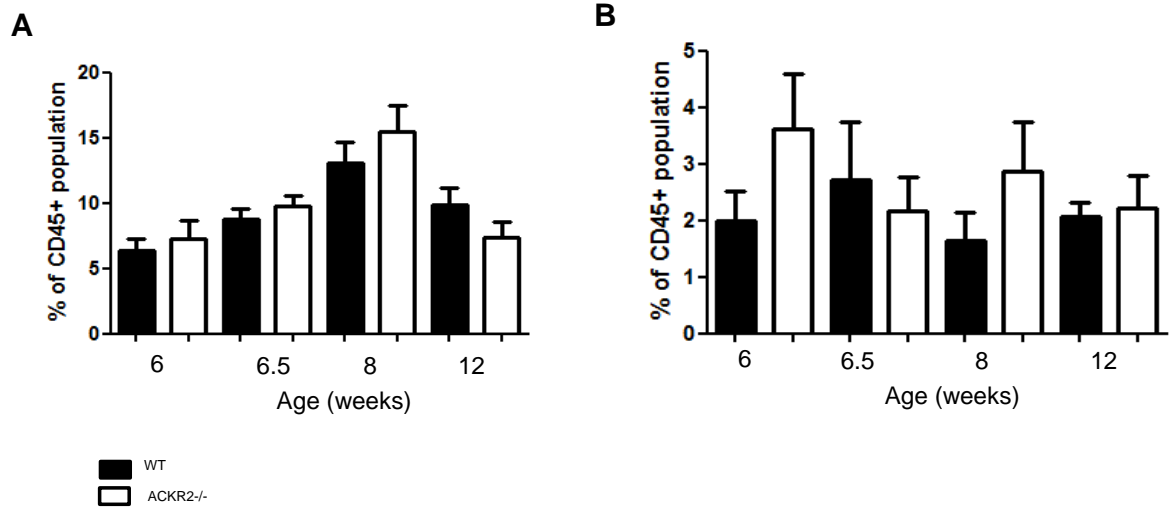

**Supplemental Figure S3: ACKR2 does not control recruitment of a) eosinophils or b) mast cells to the developing mammary gland.** FACS analysis of WT and ACKR2<sup>-/-</sup> deficient glands was carried out at 6, 6.5, 8 and 12 weeks. Results were combined from 2 independent experiments, n=8 to 11. Where there is no indication results were not statistically significant. Error bars represent S.E.M.

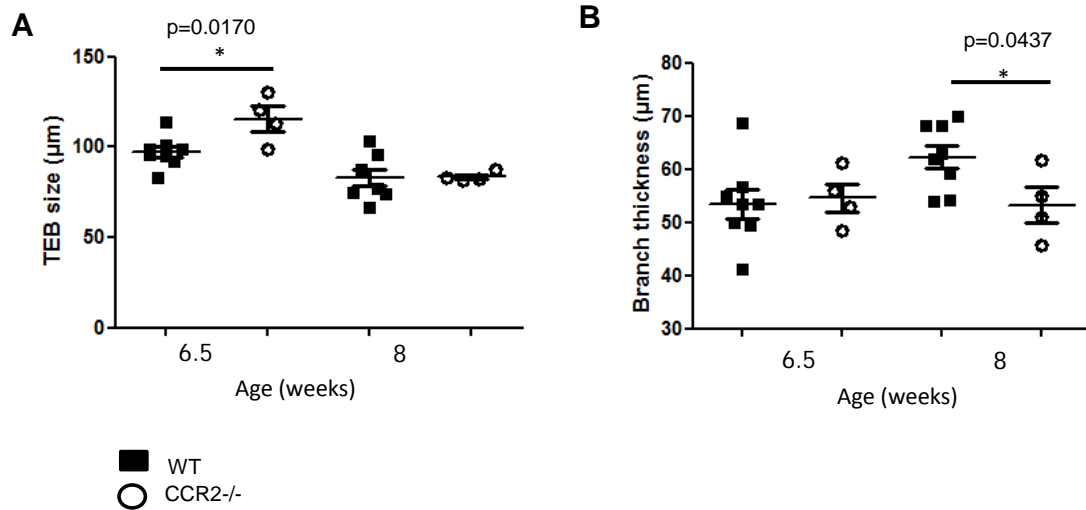

**Supplemental Figure S4: CCR2<sup>-/-</sup> mice display mild alterations in branch morphology.** Whole-mount images were analysed for a) TEB size and b) branch thickness at 6.5 and 8 weeks. WT data points are the same as those used in Supplementary Figure 1. Where there is no indication results were not statistically significant. Error bars represent S.E.M.

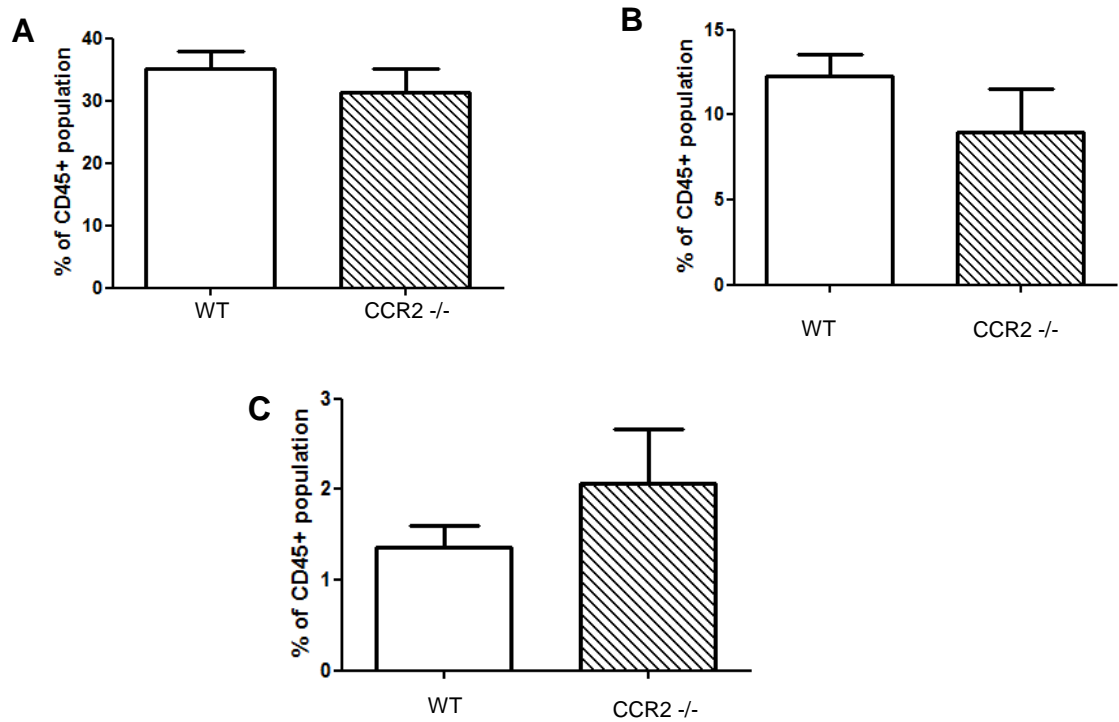

**Supplemental Figure S5: CCR2 does not control recruitment of a) macrophages, b) eosinophils, or c) mast cells to the developing mammary gland at 8 weeks.** Results were combined from 2 independent experiments, n=9 to 11. Where there is no indication results were not statistically significant. Error bars represent S.E.M.

**Supplemental Table S1: Differential gene regulation in pubertal ACKR2 deficient mice**

| 6.5 week<br>Upregulated<br>(>2 fold) | 6.5 week<br>Downregulated<br>(>-2 fold) | 8 week<br>Upregulated<br>(>2 fold) | 8 week<br>Downregulated<br>(>-2 fold) |
|--------------------------------------|-----------------------------------------|------------------------------------|---------------------------------------|
| CCR5                                 | CCR4                                    | CCL1                               | CXCR5                                 |
| CCL24                                | CXCR2                                   | ACKR4                              | CCR11                                 |
| CCL9                                 | CXCL3                                   | Cmtm6                              | CCR2                                  |
| CCR1                                 | IL-6                                    | CCL22                              | CXCR2                                 |
| CXCL4 (PF4)                          | Cmtm2a                                  | Cmtm5                              | Cmtm2a                                |
| CXCL7 (PPBP)                         |                                         | TYMP                               | CCR8                                  |
| IL-4                                 |                                         |                                    | CCR7                                  |
| CCL3                                 |                                         |                                    | CCR4                                  |
| XCR1                                 |                                         |                                    |                                       |
| CCR11                                |                                         |                                    |                                       |
| CCR6                                 |                                         |                                    |                                       |
| CCR3                                 |                                         |                                    |                                       |
| CCR8                                 |                                         |                                    |                                       |

Red type denotes significantly different gene regulation,  $p < 0.05$
